# Supplementary material for: High-activity Mo, S co-doped carbon quantum dot nanozyme-based cascade colorimetric biosensor for sensitive detection of cholesterol
Source: Royal Society of Chemistry journal article supplement (doi:10.1039/c9tb01731c), 2019-01-01
Supplement: c9tb01731c1.pdf [file c9tb01731c1.pdf]

## Supporting Information

### **Novel Mo, S co-doped carbon quantum dots as highly efficient peroxidase mimics for sensitive detection of cholesterol**

Lianjing Zhao<sup>a</sup>, Zepei Wu<sup>a</sup>, Guannan Liu<sup>a</sup>, Huiying Lu<sup>a</sup>, Yuan Gao<sup>\*a</sup>, Fangmeng Liu<sup>a</sup>,  
Chenguang Wang<sup>a</sup>, Jiuwei Cui<sup>\*b</sup>, and Geyu Lu<sup>\*a</sup>

<sup>a</sup> State Key Laboratory on Integrated Optoelectronics, College of Electronic Science and Engineering, Jilin University, 2699 Qianjin Street, Changchun 130012, China

<sup>b</sup> Cancer Center, The First Hospital of Jilin University, Changchun 130021, China

\*Corresponding authors:

Yuan Gao, Tel.: +86 431 85168384;

Email: [gaoyuan@jlu.edu.cn](mailto:gaoyuan@jlu.edu.cn) (Y. Gao).

Jiuwei Cui, Tel.: +86 431 88786134

Email: [cuijw@jlu.edu.cn](mailto:cuijw@jlu.edu.cn) (J. Cui)

Geyu Lu, Tel.: +86 431 85167808;

Email: [luggy@jlu.edu.cn](mailto:luggy@jlu.edu.cn) (G. Lu).

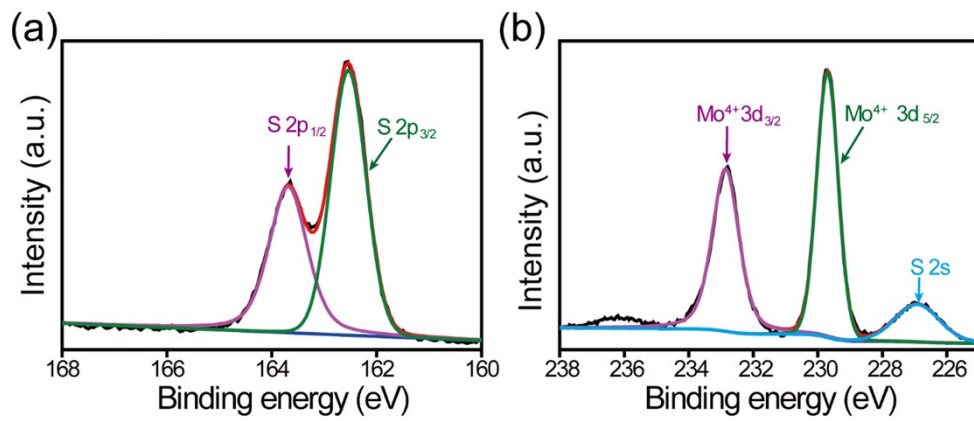

**Fig. S1.** (a, b) High resolution XPS spectra of Mo 3d and S2p in origin bulk MoS<sub>2</sub>.

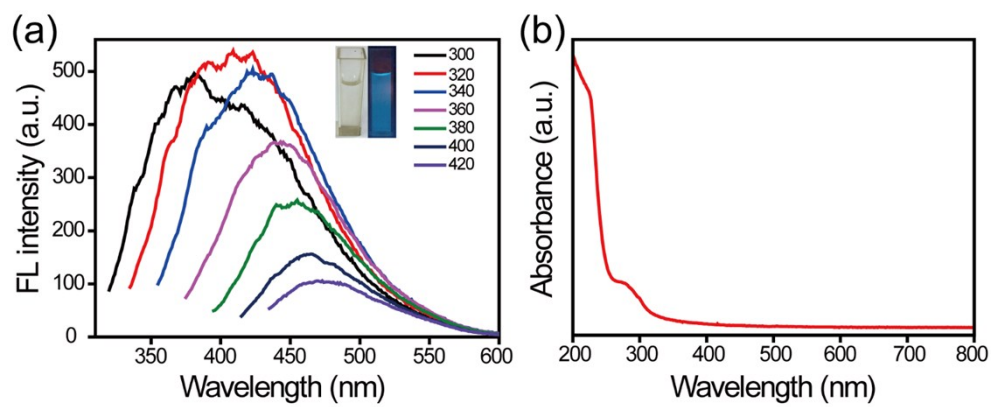

**Fig. S2.** (a) PL spectra of Mo-CQDs. Inset: photographs of Mo-CQDs under daylight (left) and UV light of 365 nm (right), (b) UV-vis absorbance spectra of Mo-CQDs.

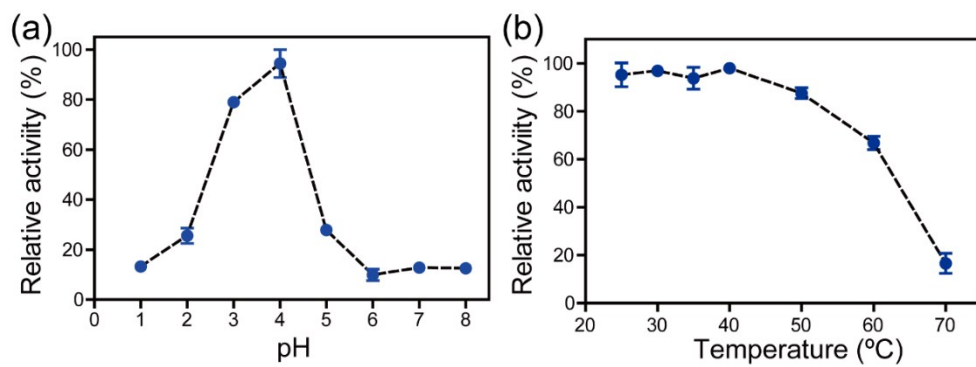

**Fig. S3.** The effects of pH (a), temperature (b) on the peroxidase activity of Mo-CQDs.

**Table S1.** The yield of carbon quantum dots of different reactive systems.

| Reactant reagents and Dosage         | Product and Yield |
|--------------------------------------|-------------------|
| Ethanol 80 mL                        | CQD 0.5 mg        |
| Ethanol 80 mL+MoS <sub>2</sub> 40 mg | Mo-CQD 17.5 mg    |

**Table S2.** Comparison of steady state kinetics parameters of various peroxidase mimics and HRP.

| Catalyst                    | $K_m$ (mM)  |                               | $V_{max}$ ( $10^{-7}$ M s $^{-1}$ ) |                               | References          |
|-----------------------------|-------------|-------------------------------|-------------------------------------|-------------------------------|---------------------|
|                             | TMB         | H <sub>2</sub> O <sub>2</sub> | TMB                                 | H <sub>2</sub> O <sub>2</sub> |                     |
| HRP                         | 0.434       | 3.7                           | 1                                   | 0.871                         | 1                   |
| Silicon dots                | 1.502       | 0.065                         | 1.472                               | 0.565                         | 2                   |
| Graphene quantum dots       | 0.01        | 8                             | 73                                  | 117                           | 3                   |
| BNNS@CuS                    | 0.175       | 25                            | 3.76                                | 12.5                          | 4                   |
| AuNPs@MoS <sub>2</sub> -QDs | 0.06        | 5                             | 106                                 | 142                           | 5                   |
| Carbon nanodots             | 0.039       | 26.77                         | 0.361                               | 3.061                         | 6                   |
| N-Graphene quantum dots     | 11.19       | 0.1                           | 0.038                               | 0.014                         | 7                   |
| <b>Mo-CQDs</b>              | <b>0.38</b> | <b>0.05</b>                   | <b>1.95</b>                         | <b>2.28</b>                   | <b>Present work</b> |

## References

- 1 L. Gao, J. Zhuang, L. Nie, J. Zhang, Y. Zhang, N. Gu, T. Wang, J. Feng, D. Yang and S. Perrett, *Nature Nanotechnology*, 2007, **2**, 577-583.
- 2 C. Qiong, L. Meiling, Z. Jiangna, P. Xue, C. Xiaojiao, M. Naxiu, Y. Bangda, L. Haitao, Z. Youyu and Y. Shouzhuo, *Chem. Commun.*, 2014, **50**, 6771-6774.
- 3 N. R. Nirala, S. Abraham, V. Kumar, A. Bansal, A. Srivastava and P. S. Saxena, *Sensors & Actuators B Chemical*, 2015, **218**, 42-50.
- 4 Y. Zhang, Y. N. Wang, X. T. Sun, L. Chen and Z. R. Xu, *Sensors & Actuators B Chemical*, 2017, **246**, 118-126.
- 5 N. R. Nirala, S. Pandey, A. Bansal, V. K. Singh, B. Mukherjee, P. S. Saxena and A. Srivastava, *Biosens. Bioelectron.*, 2015, **74**, 207-213.
- 6 S. Wenbing, W. Qinlong, L. Yijuan, C. Zhiliang, C. Shihong, Z. Huzhi and H. Yuming, *Chem. Commun.*, 2011, **47**, 6695-6697.
- 7 L. Lin, X. Song, Y. Chen, M. Rong, T. Zhao, Y. Wang, Y. Jiang and X. Chen, *Anal. Chim. Acta*, 2015, **869**, 89-95.
